# Supplementary material for: Barley NARROW LEAFED DWARF1 encoding a WUSCHEL-RELATED HOMEOBOX 3 (WOX3) regulates the marginal development of lateral organs
Source: PubMed Central journal article supplement — Breed Sci. 2016 May 20;66(3):416–24. doi: 10.1270/jsbbs.16019 (PMC4902465; doi:10.1270/jsbbs.16019), 2016-05-20
Supplement: 66_16019_1.pdf [file 66_16019_1.pdf]

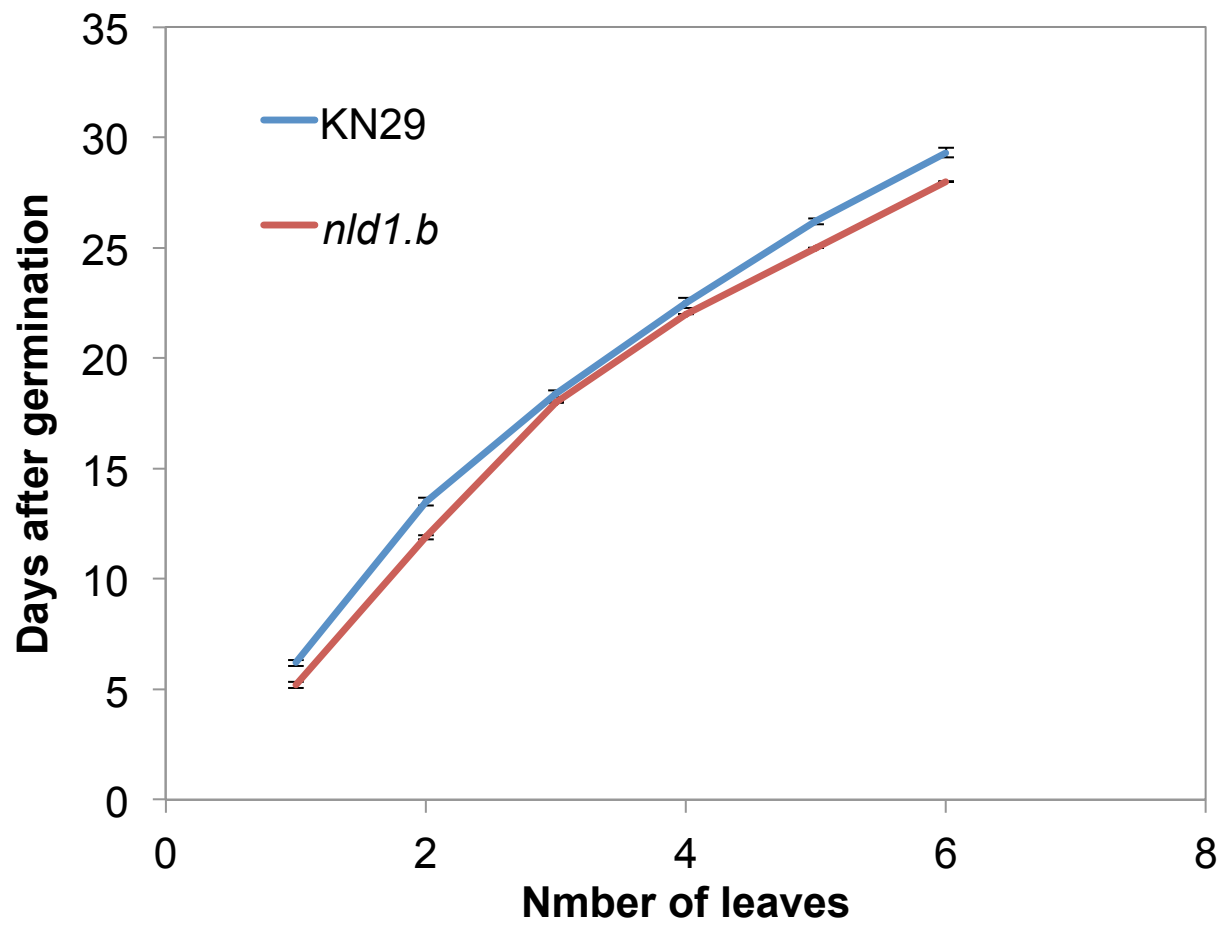

**Supplemental Fig. 1. Comparison of the leaf emerging rate between wild-type (KN29) and *nld1.b*.**

Results are shown as means  $\pm$ SE (n=10).

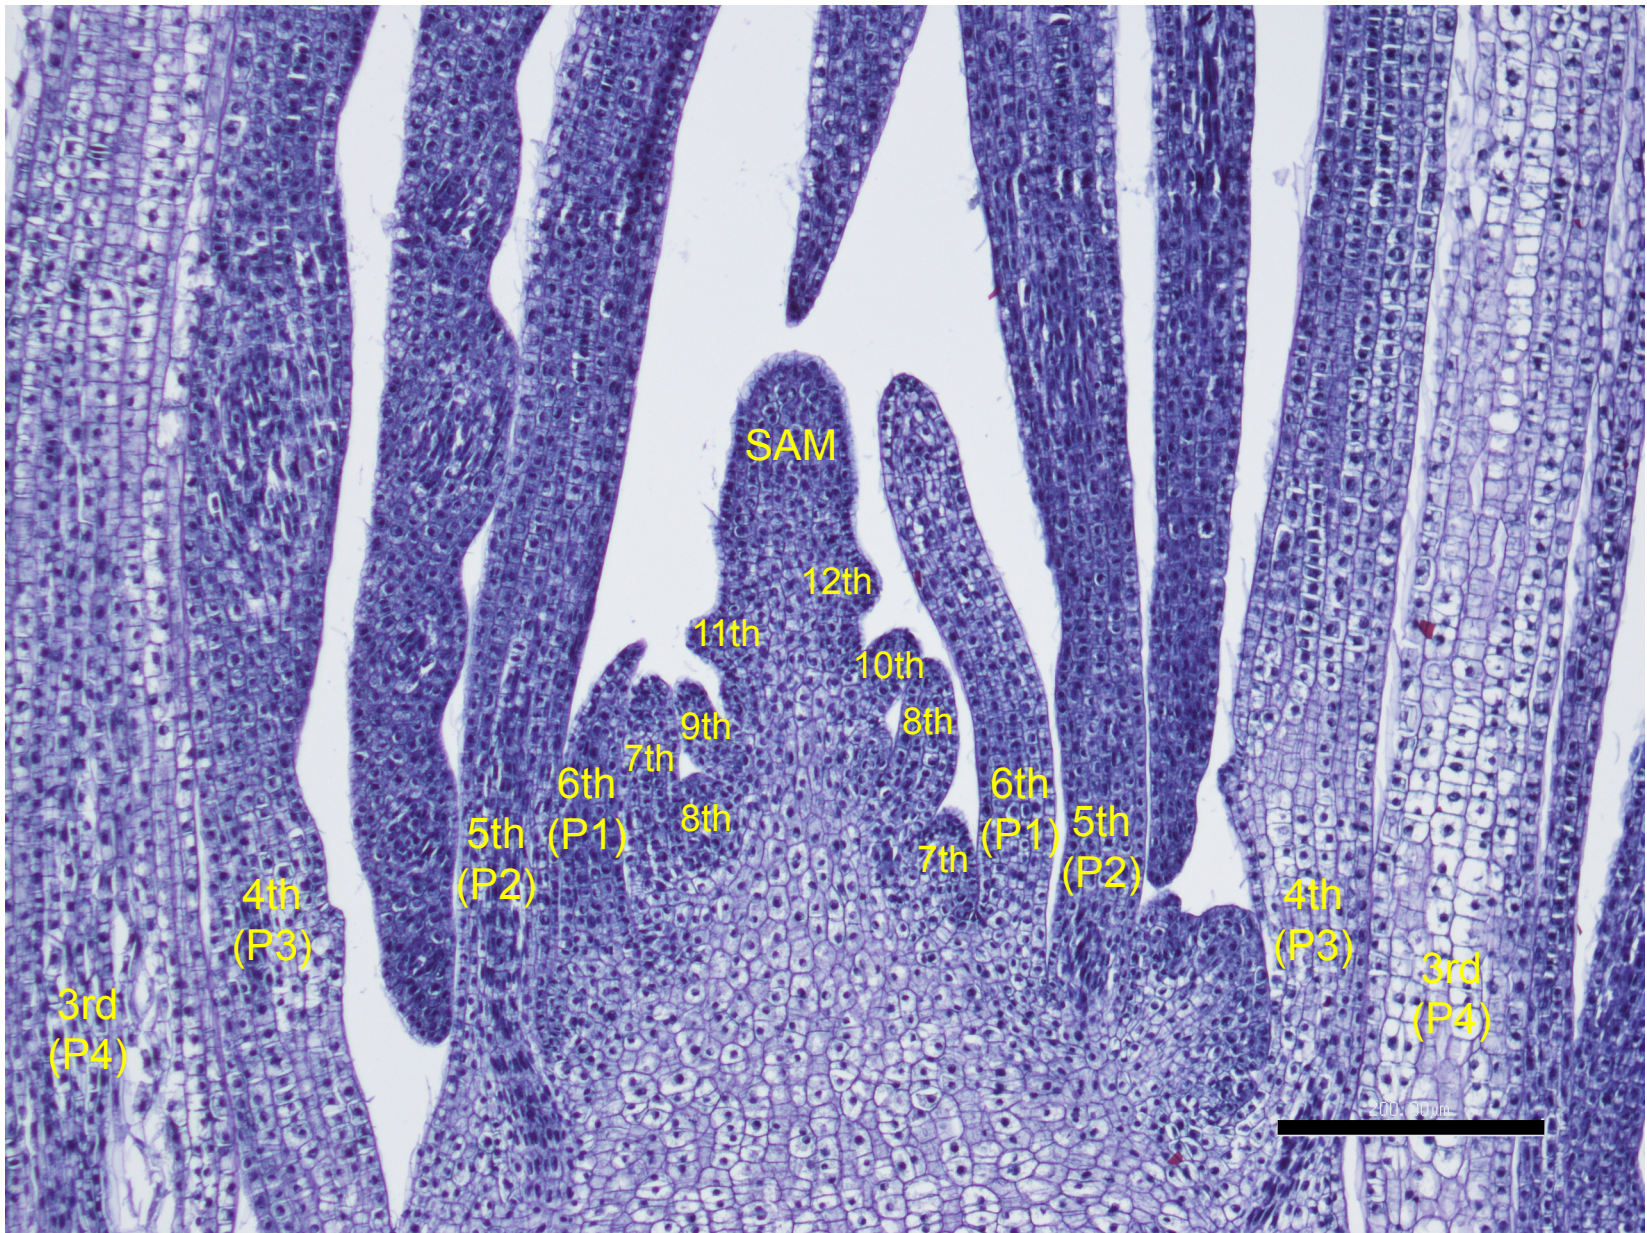

**Supplemental Fig. 2. The longitudinal section of the shoot apex of wild-type (KN29).**

Seedling at the 2nd leaf stage is used as the plant material. The shoot apical meristem (SAM), the leaf positions (3rd to 12th), and the leaf primordial stages (P1-P4) are shown in the figure.

Bar = 200μm.

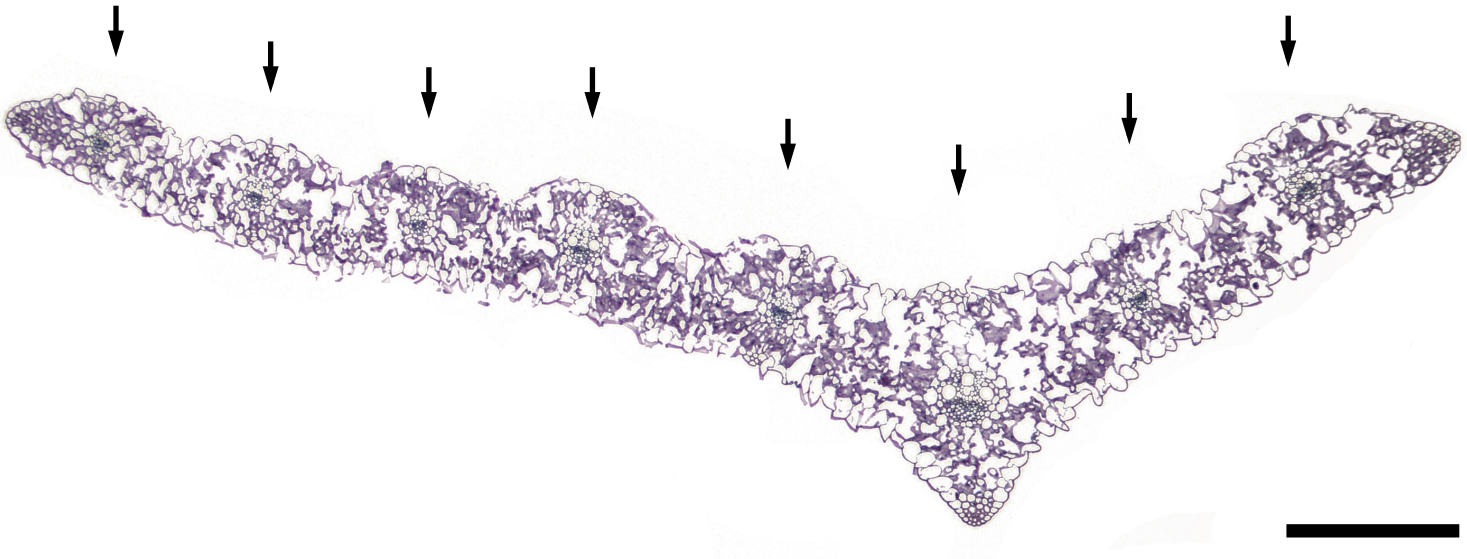

**Supplemental Fig. 3. Asymmetrically-developed 2nd leaf blade in *nld1.a*.**

Arrows indicate the positions of vascular bundle.

Bar = 400 $\mu$ m.

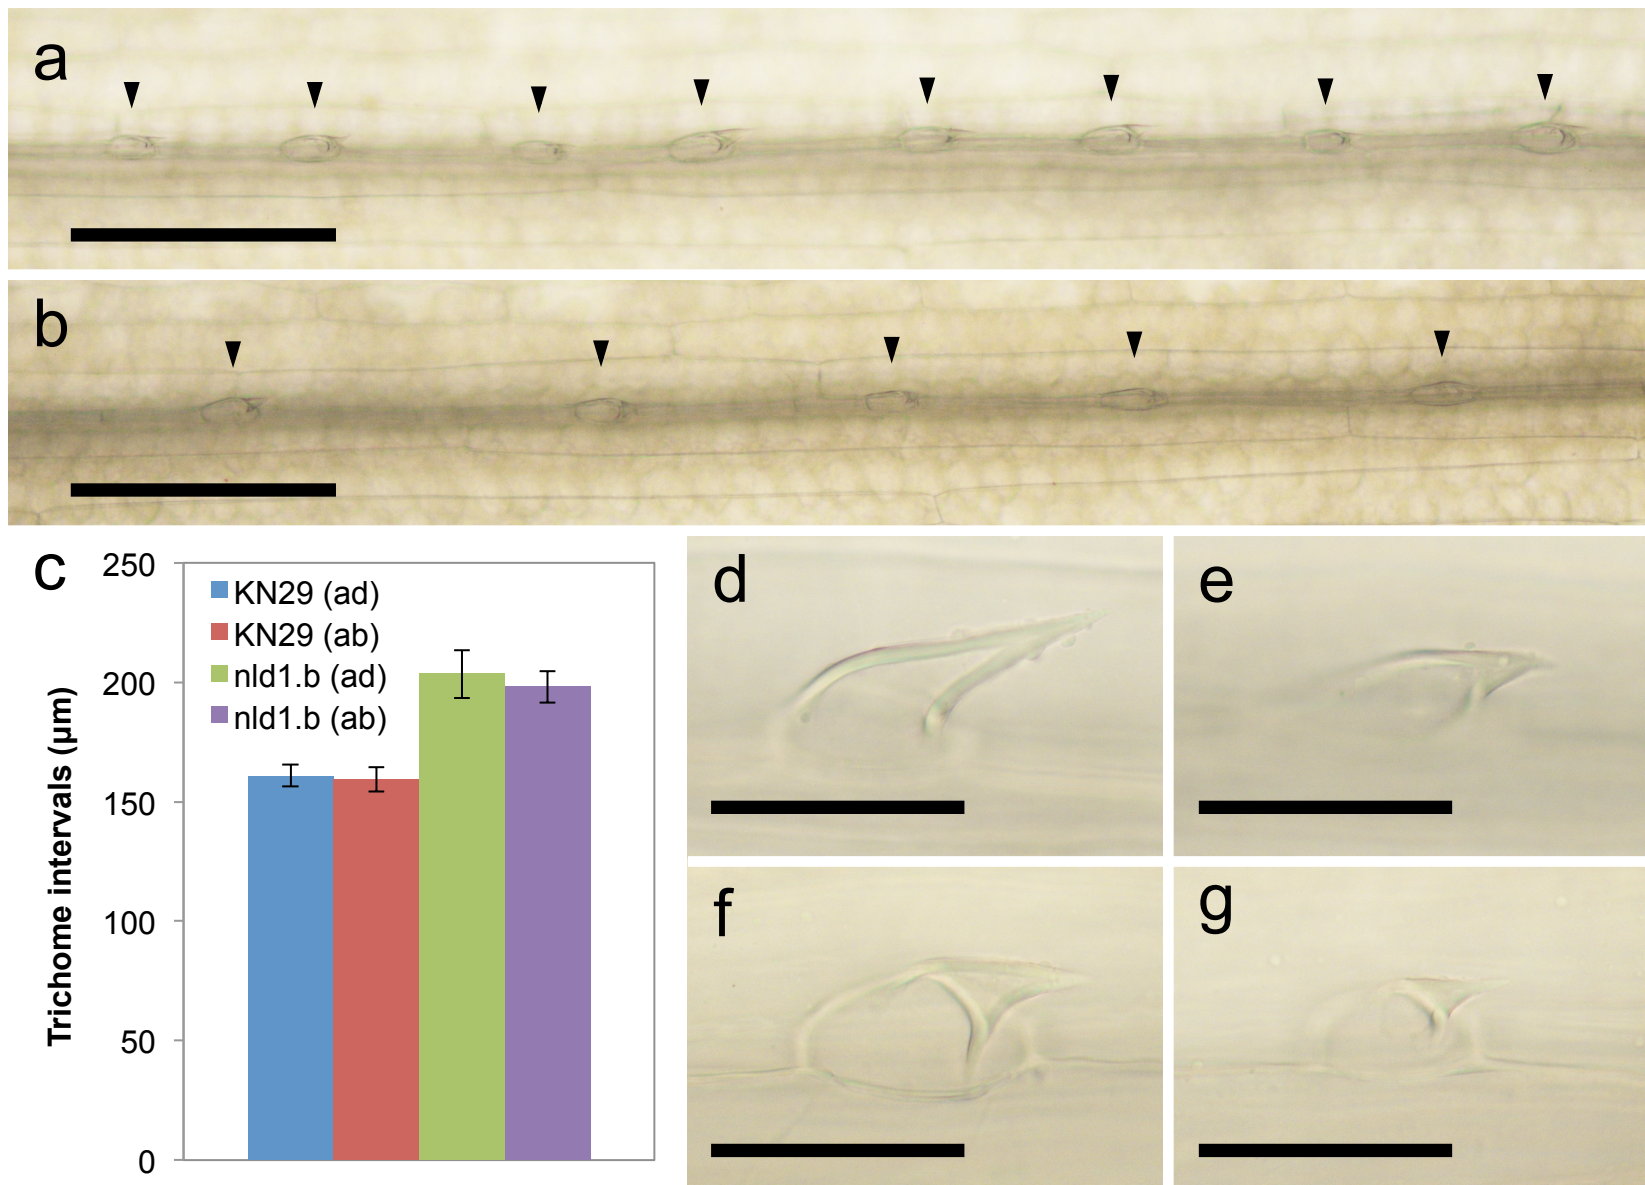

**Supplemental Fig. 4. Comparison of the trichome development between wild-type and *nld1.b*.**

(a and b) The distribution of trichomes on the adaxial-side of the 2nd leaf-blades of wild-type (KN29) (a) and *nld1.b* (b). Arrow heads indicate the positions of trichomes.

(c) The comparison of the trichome intervals on the 2nd leaf-blades between wild-type (KN29) and *nld1.b*. ad and ab indicate adaxial and abaxial side, respectively.

(d-g) Variation of trichomes on the 2nd leaf-blades of wild-type (KN29) (d,e) and *nld1.b* (f,g). (d) and (f) are largest trichomes, and (e) and (g) are smallest ones.

Bars = 200μm (a,b), 50μm (d-g)

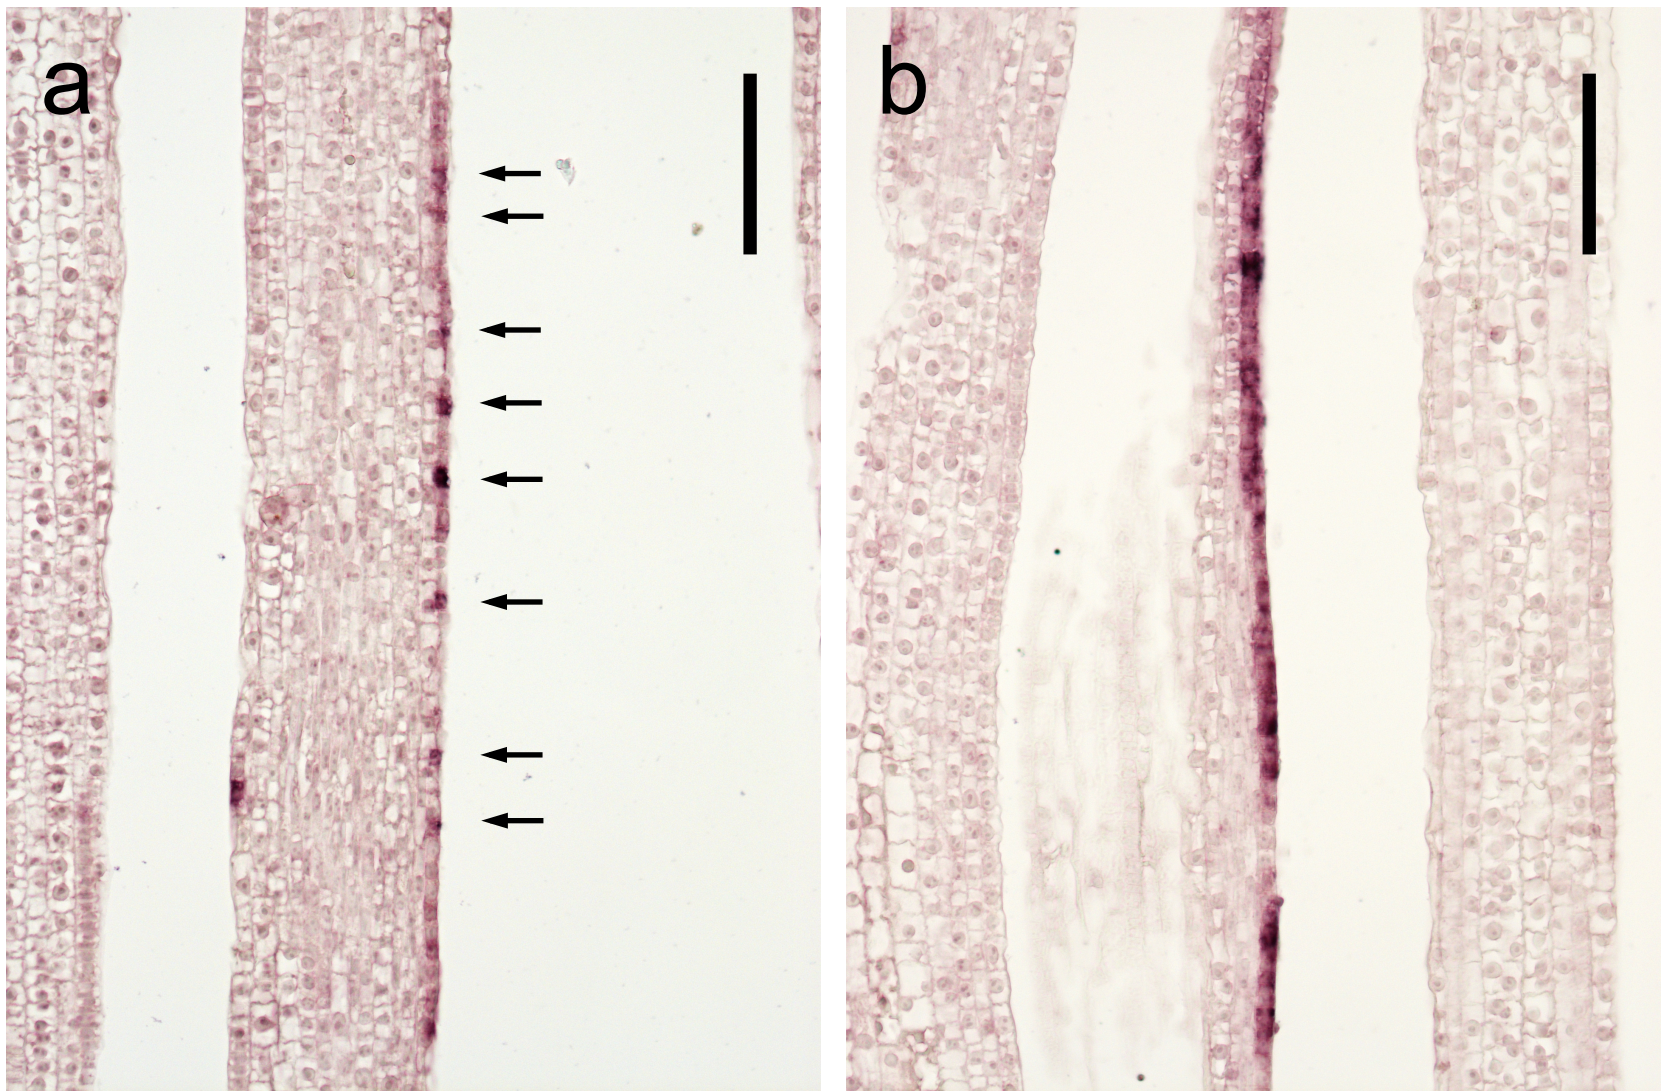

**Supplemental Fig. 5. Expression pattern of the *NLD1* gene in leaf primordia.**

(a and b) Longitudinal section of leaf primordia in wild-type (KN29) hybridized with *NLD1* anti-sense probe. The localization of *NLD1* transcripts on the epidermal cells along with longitudinal vein is interspersed (arrows in (a)), while *NLD1* transcripts are continuously localized in leaf edges (b).

Bar = 100 $\mu$ m.
